# Supplementary material for: Examining Sociodemographic Factors, Reasons, and Barriers in the Diversity of Fruit and Vegetable Intake among Undergraduate Students
Source: MDPI journal article supplement (doi:10.3390/nu16060779), 2024-03-09

**Supplementary Figure S1** The example of fruit portion size provided in the questionnaire for estimating the amount of each fruit variety consumption.

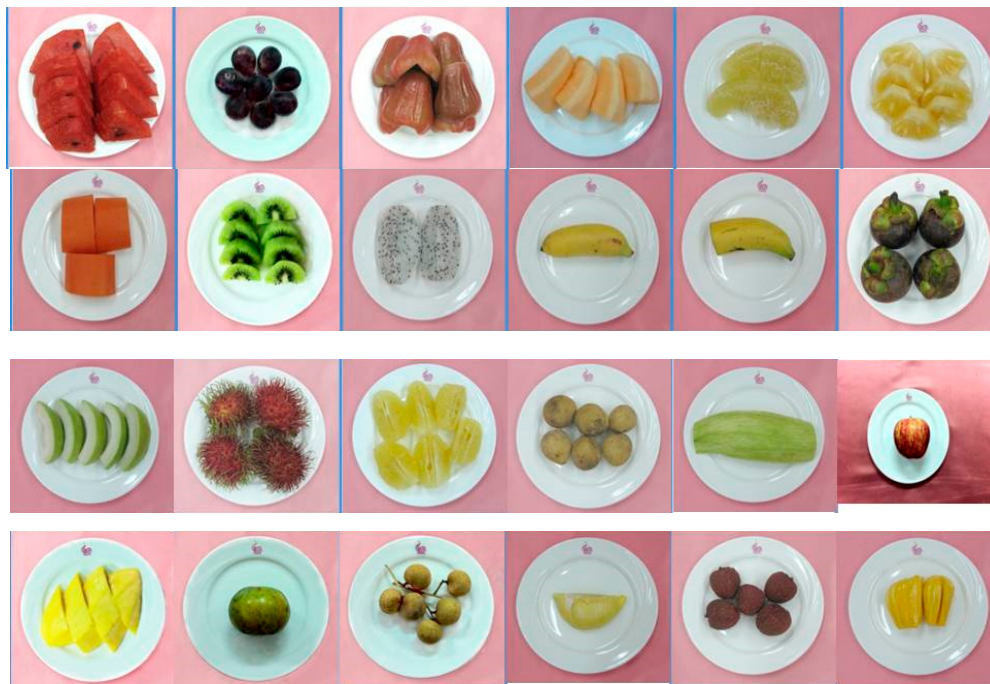

**Supplementary Figure S2** The example of vegetable portion size provided in the questionnaire for estimating the amount of each vegetable variety consumption.

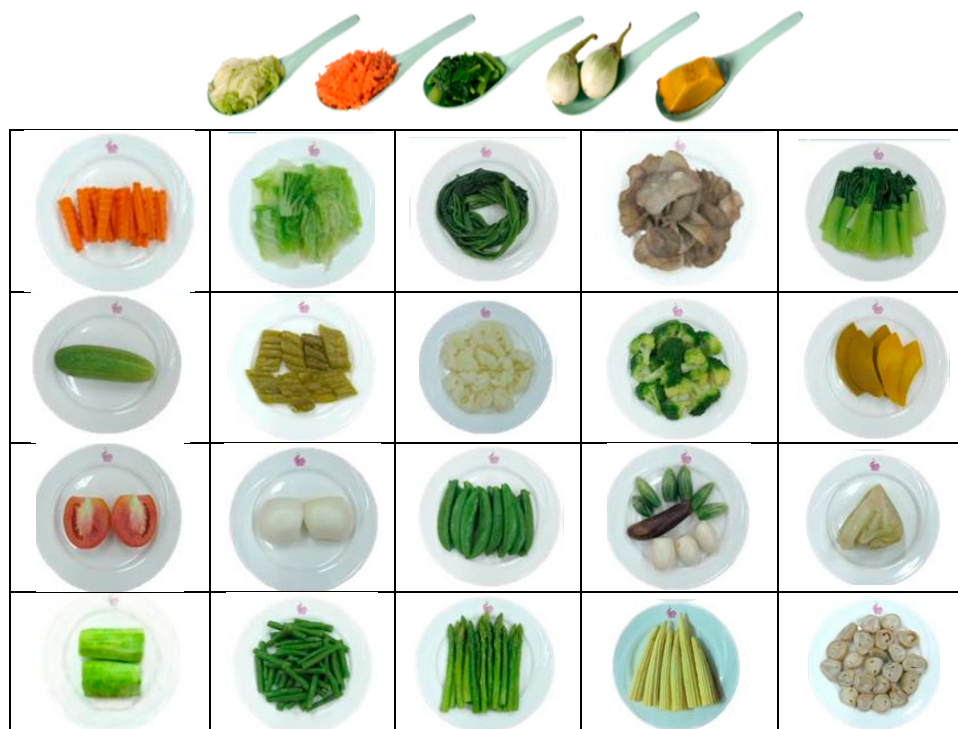

Supplement: s1 [file s1]
