# Supplementary material for: Examining Sociodemographic Factors, Reasons, and Barriers in the Diversity of Fruit and Vegetable Intake among Undergraduate Students
Source: MDPI journal article supplement (doi:10.3390/nu16060779), 2024-03-09
Supplement: s1 [file s1]

**Supplementary Table S1** The list of each fruit and vegetable variety.

| Varieties                                                   | Example                                                                                                                                   |
|-------------------------------------------------------------|-------------------------------------------------------------------------------------------------------------------------------------------|
| <b>Fruits</b>                                               |                                                                                                                                           |
| 1. Citrus fruit                                             | Pomelo                                                                                                                                    |
| 2. Pome fruit                                               | Apple                                                                                                                                     |
| 3. Berries and other small fruit                            | Grape                                                                                                                                     |
| 4. Assorted tropical and subtropical fruits (edible peel)   | Santol, rose apple, jujube, guava                                                                                                         |
| 5. Assorted tropical and subtropical fruits (inedible peel) | Longan, durian, mangosteen, lichee, mango, rambutan, pineapple, coconut, dragon fruit, custard apple, longkang, jackfruit, zalaca, banana |
| 6. Melon fruit                                              | Cantaloup, watermelon                                                                                                                     |
| <b>Vegetables</b>                                           |                                                                                                                                           |
| 1. <i>Cucurbitaceae</i>                                     | Cucumber, gourd, pumpkin, squash, bitter melon, grandis                                                                                   |
| 2. <i>Brassicaceae</i>                                      | Cabbage, cauliflower, kale, broccoli, choy, chinese cabbage, radish                                                                       |
| 3. <i>Solanaceae</i>                                        | Tomato, potato                                                                                                                            |
| 4. <i>Lamiaceae</i>                                         | Basil                                                                                                                                     |
| 5. <i>Physalacriaceae</i>                                   | Mushroom                                                                                                                                  |
| 6. <i>Fabaceae</i>                                          | Cowpea                                                                                                                                    |
| 7. <i>Asteraceae</i>                                        | Lettuce                                                                                                                                   |

**Supplementary Table S2** Fruit form purchased by undergraduate students.

| Purchased form      | Fruit intake               |                        |                          |
|---------------------|----------------------------|------------------------|--------------------------|
|                     | Total<br>( <i>n</i> = 538) | No<br>( <i>n</i> = 43) | Yes<br>( <i>n</i> = 495) |
| Raw fruit (%)       | 100.0                      | 100.0                  | 100.0                    |
| Processed fruit (%) | 39.0                       | 32.6                   | 39.6                     |

**Supplementary Table S3** Vegetable form purchased by undergraduate students.

| Purchased form          | vegetable intake           |                       |                          |
|-------------------------|----------------------------|-----------------------|--------------------------|
|                         | Total<br>( <i>n</i> = 541) | No<br>( <i>n</i> = 9) | Yes<br>( <i>n</i> = 532) |
| Cooked vegetable (%)    | 95.2                       | 88.9                  | 95.3                     |
| Raw vegetable (%)       | 65.6                       | 33.3                  | 66.2                     |
| Processed vegetable (%) | 26.6                       | N/A                   | 27.1                     |

**Supplementary Table S4** The association of sociodemographic characteristics of fruit intake ( $n = 542$ ).

| Variables               | Citrus fruit |         |                 | Pone fruit |         |                 | Berries and other small fruit |         |                 | Assorted tropical and subtropical fruits (edible peel) |         |                 | Assorted tropical and subtropical fruits (inedible peel) |         |                 | Melon fruit |         |                 |
|-------------------------|--------------|---------|-----------------|------------|---------|-----------------|-------------------------------|---------|-----------------|--------------------------------------------------------|---------|-----------------|----------------------------------------------------------|---------|-----------------|-------------|---------|-----------------|
|                         | No (%)       | Yes (%) | <i>p</i> -value | No (%)     | Yes (%) | <i>p</i> -value | No (%)                        | Yes (%) | <i>p</i> -value | No (%)                                                 | Yes (%) | <i>p</i> -value | No (%)                                                   | Yes (%) | <i>p</i> -value | No (%)      | Yes (%) | <i>p</i> -value |
| Sex                     |              |         |                 |            |         |                 |                               |         |                 |                                                        |         |                 |                                                          |         |                 |             |         |                 |
| Male                    | 80.9         | 19.1    | 0.801           | 56.4       | 43.6    | 0.030*          | 65.4                          | 34.6    | 0.167           | 52.1                                                   | 47.9    | <0.001***       | 15.4                                                     | 84.6    | 0.057           | 47.9        | 52.1    | 0.510           |
| Female                  | 79.9         | 20.1    |                 | 46.6       | 53.4    |                 | 71.2                          | 28.8    |                 | 33.6                                                   | 66.4    |                 | 9.9                                                      | 90.1    |                 | 33.3        | 36.0    |                 |
| BMI                     |              |         |                 |            |         |                 |                               |         |                 |                                                        |         |                 |                                                          |         |                 |             |         |                 |
| Underweight             | 81.9         | 18.1    | 0.179           | 55.2       | 44.8    | 0.268           | 71.6                          | 28.4    | 0.406           | 37.9                                                   | 62.1    | 0.809           | 12.1                                                     | 87.9    | 0.521           | 51.7        | 48.3    | 0.467           |
| Normal                  | 77.7         | 22.3    |                 | 46.3       | 53.7    |                 | 66.6                          | 33.4    |                 | 41.6                                                   | 58.4    |                 | 12.5                                                     | 87.5    |                 | 48.3        | 51.7    |                 |
| Overweight              | 89.4         | 10.6    |                 | 51.5       | 48.5    |                 | 69.7                          | 30.3    |                 | 40.9                                                   | 59.1    |                 | 13.6                                                     | 86.4    |                 | 57.6        | 42.4    |                 |
| Obese                   | 79.7         | 20.3    |                 | 56.3       | 43.8    |                 | 76.6                          | 23.4    |                 | 35.9                                                   | 64.1    |                 | 6.3                                                      | 93.8    |                 | 45.3        | 54.7    |                 |
| Study Fields            |              |         |                 |            |         |                 |                               |         |                 |                                                        |         |                 |                                                          |         |                 |             |         |                 |
| Health Sciences         | 79.3         | 20.7    | 0.517           | 45.8       | 54.2    | 0.274           | 72.4                          | 27.6    | 0.091           | 35.0                                                   | 65.0    | 0.175           | 10.8                                                     | 89.2    | 0.849           | 50.7        | 49.3    | 0.481           |
| Social and Humanities   | 83.0         | 17.0    |                 | 51.1       | 48.9    |                 | 71.4                          | 28.6    |                 | 43.4                                                   | 56.6    |                 | 12.1                                                     | 87.9    |                 | 52.2        | 47.8    |                 |
| Sciences and Technology | 78.3         | 21.7    |                 | 54.1       | 45.9    |                 | 62.4                          | 37.6    |                 | 42.7                                                   | 57.3    |                 | 12.7                                                     | 87.3    |                 | 45.9        | 54.1    |                 |
| Academic Years          |              |         |                 |            |         |                 |                               |         |                 |                                                        |         |                 |                                                          |         |                 |             |         |                 |
| Freshman                | 76.2         | 23.8    | 0.503           | 46.7       | 53.3    | 0.438           | 63.9                          | 36.1    | 0.182           | 40.2                                                   | 59.8    | 0.893           | 13.9                                                     | 86.1    | 0.363           | 46.7        | 53.3    | 0.659           |
| Sophomore               | 79.3         | 20.7    |                 | 53.3       | 46.7    |                 | 67.4                          | 32.6    |                 | 37.8                                                   | 62.2    |                 | 14.8                                                     | 85.2    |                 | 51.1        | 48.9    |                 |
| Junior                  | 83.5         | 16.5    |                 | 45.7       | 54.3    |                 | 76.4                          | 23.6    |                 | 42.5                                                   | 57.5    |                 | 9.4                                                      | 90.6    |                 | 47.2        | 52.8    |                 |
| Senior                  | 81.6         | 18.4    |                 | 53.2       | 46.8    |                 | 69.0                          | 31.0    |                 | 39.9                                                   | 60.1    |                 | 9.5                                                      | 90.5    |                 | 53.2        | 46.8    |                 |
| Living                  |              |         |                 |            |         |                 |                               |         |                 |                                                        |         |                 |                                                          |         |                 |             |         |                 |
| Parents                 | 74.1         | 25.9    | 0.021*          | 39.6       | 60.4    | 0.001***        | 58.4                          | 41.6    | <0.001***       | 34.0                                                   | 66.0    | 0.084           | 7.6                                                      | 92.4    | 0.046*          | 48.7        | 51.3    | 0.134           |
| Roommates               | 84.8         | 15.2    |                 | 55.2       | 44.8    |                 | 73.8                          | 26.2    |                 | 42.4                                                   | 57.6    |                 | 12.9                                                     | 87.1    |                 | 46.2        | 53.8    |                 |
| Alone                   | 82.2         | 17.8    |                 | 57.0       | 43.0    |                 | 77.8                          | 22.2    |                 | 45.2                                                   | 54.8    |                 | 16.3                                                     | 83.7    |                 | 57.0        | 43.0    |                 |
| Income                  |              |         |                 |            |         |                 |                               |         |                 |                                                        |         |                 |                                                          |         |                 |             |         |                 |
| ≤ 5,000 bath/month      | 79.9         | 20.1    | 0.325           | 50.0       | 50.0    | 0.939           | 73.0                          | 27.0    | 0.395           | 35.6                                                   | 64.4    | 0.179           | 12.1                                                     | 87.9    | 0.470           | 52.3        | 47.7    | 0.638           |
| 5,001-10,000 bath/month | 82.3         | 17.7    |                 | 49.4       | 50.6    |                 | 67.9                          | 32.1    |                 | 43.9                                                   | 56.1    |                 | 12.9                                                     | 87.1    |                 | 49.4        | 50.6    |                 |
| >10,000 bath/month      | 75.3         | 24.7    |                 | 51.5       | 48.5    |                 | 66.0                          | 34.0    |                 | 37.1                                                   | 62.9    |                 | 8.2                                                      | 91.8    |                 | 46.4        | 53.6    |                 |
| Online class            |              |         |                 |            |         |                 |                               |         |                 |                                                        |         |                 |                                                          |         |                 |             |         |                 |
| ≤ 3 days/week           | 83.1         | 16.9    | 0.104           | 47.1       | 52.9    | 0.197           | 69.7                          | 30.3    | 0.792           | 42.5                                                   | 57.5    | 0.254           | 10.3                                                     | 89.7    | 0.309           | 51.0        | 49.0    | 0.608           |
| > 3 days/week           | 77.6         | 22.4    |                 | 52.7       | 47.3    |                 | 68.7                          | 31.3    |                 | 37.7                                                   | 62.3    |                 | 13.2                                                     | 86.8    |                 | 48.8        | 51.2    |                 |
| Digital usage           |              |         |                 |            |         |                 |                               |         |                 |                                                        |         |                 |                                                          |         |                 |             |         |                 |

|                                           |       |      |       |           |      |       |      |       |       |      |      |       |         |       |       |      |       |       |      |      |           |      |      |
|-------------------------------------------|-------|------|-------|-----------|------|-------|------|-------|-------|------|------|-------|---------|-------|-------|------|-------|-------|------|------|-----------|------|------|
| < 3 hours/day                             | 77.4  | 22.6 | 0.854 | 35.8      | 64.2 | 0.093 | 62.3 | 37.7  | 0.297 | 32.1 | 67.9 | 0.351 | 3.8     | 96.2  | 0.149 | 56.6 | 43.4  | 0.226 |      |      |           |      |      |
| 3-6 hours/day                             | 80.4  | 19.6 |       | 52.0      | 48.0 |       | 67.6 | 32.4  |       | 42.7 | 57.3 |       | 13.3    | 86.7  |       | 52.4 | 47.6  |       |      |      |           |      |      |
| > 6 hours/day                             | 80.7  | 19.3 |       | 51.1      | 48.9 |       | 72.0 | 28.0  |       | 39.4 | 60.6 |       | 12.1    | 87.9  |       | 46.2 | 53.8  |       |      |      |           |      |      |
| Physical activity                         |       |      |       |           |      |       |      |       |       |      |      |       |         |       |       |      |       |       |      |      |           |      |      |
| Sufficient                                | 77.2  | 22.8 | 0.635 | 45.6      | 54.4 | 0.059 | 65.8 | 34.2  | 0.548 | 41.2 | 58.8 | 0.259 | 13.2    | 86.8  | 0.613 | 44.7 | 55.3  | 0.350 |      |      |           |      |      |
| Insufficient                              | 80.6  | 19.4 |       | 46.1      | 53.9 |       | 68.7 | 31.3  |       | 35.9 | 64.1 |       | 10.1    | 89.9  |       | 49.3 | 50.7  |       |      |      |           |      |      |
| Inactivity                                | 81.5  | 18.5 |       | 56.4      | 43.6 |       | 71.6 | 28.4  |       | 43.6 | 56.4 |       | 12.8    | 87.2  |       | 53.1 | 46.9  |       |      |      |           |      |      |
| Smoking                                   |       |      |       |           |      |       |      |       |       |      |      |       |         |       |       |      |       |       |      |      |           |      |      |
| Smoking                                   | 80.0  | 20.0 | 0.980 | 53.3      | 46.7 | 0.793 | 73.3 | 26.7  | 0.724 | 60.0 | 40.0 | 0.110 | 0.0     | 100.0 | 0.151 | 53.3 | 46.7  | 0.782 |      |      |           |      |      |
| No smoking                                | 80.3  | 19.7 |       | 49.9      | 50.1 |       | 69.1 | 30.9  |       | 39.5 | 60.5 |       | 12.1    | 87.9  |       | 49.7 | 50.3  |       |      |      |           |      |      |
| Cooking method                            |       |      |       |           |      |       |      |       |       |      |      |       |         |       |       |      |       |       |      |      |           |      |      |
| by themself                               | 82.8  | 17.2 |       | <0.001*** | 55.2 |       | 44.8 | 0.058 |       | 79.3 | 20.7 |       | 0.004** | 48.3  |       | 51.7 | 0.290 |       | 31.0 | 69.0 | <0.001*** | 58.6 | 41.4 |
| Buying from outside                       | 83.7  | 16.3 | 52.3  |           | 47.7 | 71.9  | 28.1 |       | 41.0  | 59.0 | 12.3 | 87.7  |         | 50.6  | 49.4  |      |       |       |      |      |           |      |      |
| by others (parents, caregivers, or maids) | 66.7  | 33.3 | 39.8  |           | 60.2 | 56.5  | 43.5 |       | 34.3  | 65.7 | 4.6  | 95.4  |         | 44.4  | 55.6  |      |       |       |      |      |           |      |      |
| Stress                                    |       |      |       |           |      |       |      |       |       |      |      |       |         |       |       |      |       |       |      |      |           |      |      |
| Low                                       | 79.5  | 20.5 | 0.349 | 51.7      | 48.3 | 0.625 | 68.1 | 31.9  | 0.792 | 42.6 | 57.4 | 0.110 | 12.6    | 87.4  | 0.347 | 52.4 | 47.6  | 0.175 |      |      |           |      |      |
| Moderate                                  | 80.6  | 19.4 |       | 47.5      | 52.5 |       | 70.5 | 29.5  |       | 35.5 | 64.5 |       | 10.1    | 89.9  |       | 47.0 | 53.0  |       |      |      |           |      |      |
| High                                      | 100.0 | 0.0  |       | 50.0      | 50.0 |       | 75.0 | 25.0  |       | 62.5 | 37.5 |       | 25.0    | 75.0  |       | 25.0 | 75.0  |       |      |      |           |      |      |
| Quality of life                           |       |      |       |           |      |       |      |       |       |      |      |       |         |       |       |      |       |       |      |      |           |      |      |
| Poor                                      | 76.9  | 23.1 | 0.892 | 76.9      | 23.1 | 0.091 | 76.9 | 23.1  | 0.724 | 53.8 | 46.2 | 0.520 | 30.8    | 69.2  | 0.096 | 53.8 | 46.2  | 0.922 |      |      |           |      |      |
| Mild                                      | 80.7  | 19.3 |       | 50.7      | 49.3 |       | 69.7 | 30.3  |       | 40.4 | 59.6 |       | 11.6    | 88.4  |       | 49.3 | 50.7  |       |      |      |           |      |      |
| Good                                      | 79.3  | 20.7 |       | 46.0      | 54.0 |       | 67.3 | 32.7  |       | 38.0 | 62.0 |       | 10.7    | 89.3  |       | 50.7 | 49.3  |       |      |      |           |      |      |

All values are represented as percentages of undergraduate students, and *P*-values were determined using the chi-square test.

**Supplementary Table S5** The association of sociodemographic characteristics of vegetable intake (*n* = 542).

| Variables               | Cucurbitaceae |         |                 | Brassicaceae |         |                 | Solanaceae |         |                 | Lamiaceae |         |                 | Physalacriaceae |         |                 | Fabaceae |         |                 | Asteraceae |         |                 |
|-------------------------|---------------|---------|-----------------|--------------|---------|-----------------|------------|---------|-----------------|-----------|---------|-----------------|-----------------|---------|-----------------|----------|---------|-----------------|------------|---------|-----------------|
|                         | No (%)        | Yes (%) | <i>p</i> -value | No (%)       | Yes (%) | <i>p</i> -value | No (%)     | Yes (%) | <i>p</i> -value | No (%)    | Yes (%) | <i>p</i> -value | No (%)          | Yes (%) | <i>p</i> -value | No (%)   | Yes (%) | <i>p</i> -value | No (%)     | Yes (%) | <i>p</i> -value |
| Sex                     |               |         |                 |              |         |                 |            |         |                 |           |         |                 |                 |         |                 |          |         |                 |            |         |                 |
| Male                    | 18.1          | 81.9    | 0.934           | 8.5          | 91.5    | 0.754           | 24.5       | 75.5    | 0.070           | 19.1      | 80.9    | 0.004**         | 24.5            | 75.5    | 0.426           | 52.1     | 47.9    | 0.156           | 42.0       | 58.0    | 0.062           |
| Female                  | 17.8          | 82.2    |                 | 9.3          | 90.7    |                 | 31.9       | 68.1    |                 | 30.5      | 69.5    |                 | 21.5            | 78.5    |                 | 58.5     | 41.5    |                 | 33.9       | 66.1    |                 |
| BMI                     |               |         |                 |              |         |                 |            |         |                 |           |         |                 |                 |         |                 |          |         |                 |            |         |                 |
| Underweight             | 21.6          | 78.4    | 0.618           | 12.1         | 87.9    | 0.318           | 32.8       | 67.2    | 0.501           | 25.0      | 75.0    | 0.050*          | 29.3            | 70.7    | 0.032*          | 62.1     | 37.9    | 0.353           | 44.8       | 55.2    | 0.029*          |
| Normal                  | 17.2          | 82.8    |                 | 7.8          | 92.2    |                 | 30.1       | 69.9    |                 | 30.4      | 69.6    |                 | 23.3            | 76.7    |                 | 56.1     | 43.9    |                 | 37.2       | 62.8    |                 |
| Overweight              | 18.2          | 81.8    |                 | 6.1          | 93.9    |                 | 22.7       | 77.3    |                 | 24.2      | 75.8    |                 | 18.2            | 81.8    |                 | 54.5     | 45.5    |                 | 22.7       | 77.3    |                 |
| Obese                   | 14.1          | 85.9    |                 | 12.5         | 87.5    |                 | 26.6       | 73.4    |                 | 14.1      | 85.9    |                 | 10.9            | 89.1    |                 | 48.4     | 51.6    |                 | 34.4       | 65.6    |                 |
| Study Fields            |               |         |                 |              |         |                 |            |         |                 |           |         |                 |                 |         |                 |          |         |                 |            |         |                 |
| Health Sciences         | 17.2          | 82.8    | 0.708           | 7.4          | 92.6    | 0.469           | 31.0       | 69.0    | 0.162           | 25.6      | 74.4    | 0.246           | 17.2            | 82.8    | 0.012*          | 57.1     | 42.9    | 0.704           | 35.5       | 64.5    | 0.188           |
| Social and Humanities   | 19.8          | 80.2    |                 | 11.0         | 89.0    |                 | 32.4       | 67.6    |                 | 30.8      | 69.2    |                 | 29.7            | 70.3    |                 | 57.7     | 42.3    |                 | 41.8       | 58.2    |                 |
| Sciences and Technology | 16.6          | 83.4    |                 | 8.9          | 91.1    |                 | 23.6       | 76.4    |                 | 22.9      | 77.1    |                 | 21.0            | 79.0    |                 | 53.5     | 46.5    |                 | 32.5       | 67.5    |                 |
| Academic Years          |               |         |                 |              |         |                 |            |         |                 |           |         |                 |                 |         |                 |          |         |                 |            |         |                 |
| Freshman                | 19.7          | 80.3    | 0.606           | 15.6         | 84.4    | 0.030*          | 27.9       | 72.1    | 0.874           | 26.2      | 73.8    | 0.912           | 27.0            | 73.0    | 0.411           | 62.3     | 37.7    | 0.468           | 37.7       | 62.3    | 0.745           |
| Sophomore               | 16.3          | 83.7    |                 | 7.4          | 92.6    |                 | 27.4       | 72.6    |                 | 28.9      | 71.1    |                 | 23.0            | 77.0    |                 | 54.8     | 45.2    |                 | 40.0       | 60.0    |                 |
| Junior                  | 15.0          | 85.0    |                 | 8.7          | 91.3    |                 | 30.7       | 69.3    |                 | 26.0      | 74.0    |                 | 18.1            | 81.9    |                 | 55.9     | 44.1    |                 | 33.9       | 66.1    |                 |
| Senior                  | 20.3          | 79.7    |                 | 5.7          | 94.3    |                 | 31.0       | 69.0    |                 | 25.3      | 74.7    |                 | 22.2            | 77.8    |                 | 53.2     | 46.8    |                 | 35.4       | 64.6    |                 |
| Living                  |               |         |                 |              |         |                 |            |         |                 |           |         |                 |                 |         |                 |          |         |                 |            |         |                 |
| Parents                 | 19.3          | 80.7    | 0.574           | 8.1          | 91.9    | 0.853           | 26.4       | 73.6    | 0.085           | 27.9      | 72.1    | 0.675           | 17.8            | 82.2    | 0.132           | 60.4     | 39.6    | 0.329           | 35.5       | 64.5    | 0.415           |
| Roommates               | 15.7          | 84.3    |                 | 9.5          | 90.5    |                 | 34.8       | 65.2    |                 | 27.1      | 72.9    |                 | 24.8            | 75.2    |                 | 53.3     | 46.7    |                 | 40.0       | 60.0    |                 |
| Alone                   | 19.3          | 80.7    |                 | 9.6          | 90.4    |                 | 25.2       | 74.8    |                 | 23.7      | 76.3    |                 | 25.9            | 74.1    |                 | 54.8     | 45.2    |                 | 33.3       | 66.7    |                 |
| Income                  |               |         |                 |              |         |                 |            |         |                 |           |         |                 |                 |         |                 |          |         |                 |            |         |                 |
| ≤ 5,000 bath/month      | 14.4          | 85.6    | 0.338           | 9.8          | 90.2    | 0.526           | 35.1       | 64.9    | 0.129           | 27.6      | 72.4    | 0.879           | 23.0            | 77.0    | 0.582           | 48.9     | 51.1    | 0.051           | 38.5       | 61.5    | 0.047*          |
| 5,001-10,000 bath/month | 19.6          | 80.4    |                 | 7.7          | 92.3    |                 | 26.9       | 73.1    |                 | 26.6      | 73.4    |                 | 23.6            | 76.4    |                 | 60.5     | 39.5    |                 | 39.5       | 60.5    |                 |
| >10,000 bath/month      | 19.6          | 80.4    |                 | 11.3         | 88.7    |                 | 25.8       | 74.2    |                 | 24.7      | 75.3    |                 | 18.6            | 81.4    |                 | 57.7     | 42.3    |                 | 25.8       | 74.2    |                 |
| Online class            |               |         |                 |              |         |                 |            |         |                 |           |         |                 |                 |         |                 |          |         |                 |            |         |                 |
| ≤ 3 days/week           | 18.8          | 81.2    | 0.608           | 8.8          | 91.2    | 0.858           | 31.0       | 69.0    | 0.403           | 28.0      | 72.0    | 0.477           | 25.3            | 74.7    | 0.136           | 61.7     | 38.3    | 0.014*          | 40.2       | 59.8    | 0.102           |

|                                           |      |      |       |      |       |           |      |      |        |      |      |         |      |      |        |      |      |       |      |      |         |
|-------------------------------------------|------|------|-------|------|-------|-----------|------|------|--------|------|------|---------|------|------|--------|------|------|-------|------|------|---------|
| > 3 days/week                             | 17.1 | 82.9 |       | 9.3  | 90.7  |           | 27.8 | 72.2 |        | 25.3 | 74.7 |         | 19.9 | 80.1 |        | 51.2 | 48.8 |       | 33.5 | 66.5 |         |
| Digital usage                             |      |      |       |      |       |           |      |      |        |      |      |         |      |      |        |      |      |       |      |      |         |
| < 3 hours/day                             | 15.1 | 84.9 | 0.833 | 3.8  | 96.2  | 0.364     | 15.1 | 84.9 | 0.056  | 24.5 | 75.5 | 0.929   | 18.9 | 81.1 | 0.596  | 54.7 | 45.3 | 0.531 | 35.8 | 64.2 | 0.979   |
| 3-6 hours/day                             | 17.8 | 82.2 |       | 9.3  | 90.7  |           | 31.1 | 68.9 |        | 27.1 | 72.9 |         | 21.3 | 78.7 |        | 59.1 | 40.9 |       | 36.4 | 63.6 |         |
| > 6 hours/day                             | 18.6 | 81.4 |       | 9.8  | 90.2  |           | 30.7 | 69.3 |        | 26.5 | 73.5 |         | 24.2 | 75.8 |        | 54.2 | 45.8 |       | 37.1 | 62.9 |         |
| Physical activity                         |      |      |       |      |       |           |      |      |        |      |      |         |      |      |        |      |      |       |      |      |         |
| Sufficient                                | 20.2 | 79.8 | 0.405 | 9.6  | 90.4  | 0.200     | 23.7 | 76.3 | 0.036* | 28.9 | 71.1 | 0.103   | 25.4 | 74.6 | 0.178  | 57.0 | 43.0 | 0.074 | 36.8 | 63.2 | 0.007** |
| Insufficient                              | 15.2 | 84.8 |       | 6.5  | 93.5  |           | 26.3 | 73.7 |        | 21.7 | 78.3 |         | 18.4 | 81.6 |        | 50.7 | 49.3 |       | 29.5 | 70.5 |         |
| Inactivity                                | 19.4 | 80.6 |       | 11.4 | 88.6  |           | 35.5 | 64.5 |        | 30.3 | 69.7 |         | 25.1 | 74.9 |        | 61.6 | 38.4 |       | 44.1 | 55.9 |         |
| Smoking                                   |      |      |       |      |       |           |      |      |        |      |      |         |      |      |        |      |      |       |      |      |         |
| Smoking                                   | 13.3 | 86.7 | 0.640 | 0.0  | 100.0 | 0.216     | 13.3 | 86.7 | 0.167  | 13.3 | 86.7 | 0.239   | 13.3 | 86.7 | 0.388  | 46.7 | 53.3 | 0.447 | 26.7 | 73.3 | 0.413   |
| No smoking                                | 18.0 | 82.0 |       | 9.3  | 90.7  |           | 29.8 | 70.2 |        | 26.9 | 73.1 |         | 22.8 | 77.2 |        | 56.5 | 43.5 |       | 37.0 | 63.0 |         |
| Cooking method                            |      |      |       |      |       |           |      |      |        |      |      |         |      |      |        |      |      |       |      |      |         |
| By themself                               | 27.6 | 72.4 | 0.333 | 24.1 | 75.9  | 0.014*    | 24.1 | 75.9 | 0.635  | 51.7 | 48.3 | 0.005** | 34.5 | 65.5 | 0.100  | 65.5 | 34.5 | 0.523 | 31.0 | 69.0 | 0.644   |
| Buying from outside                       | 17.8 | 82.2 |       | 8.4  | 91.6  |           | 30.4 | 69.6 |        | 24.4 | 75.6 |         | 23.2 | 76.8 |        | 56.3 | 43.7 |       | 37.8 | 62.2 |         |
| By others (parents, caregivers, or maids) | 15.7 | 84.3 |       | 7.4  | 92.6  |           | 26.9 | 73.1 |        | 27.8 | 72.2 |         | 16.7 | 83.3 |        | 53.7 | 46.3 |       | 34.3 | 65.7 |         |
| Stress                                    |      |      |       |      |       |           |      |      |        |      |      |         |      |      |        |      |      |       |      |      |         |
| Low                                       | 18.3 | 81.7 | 0.813 | 9.8  | 90.2  | 0.701     | 29.3 | 70.7 | 0.875  | 26.2 | 73.8 | 0.962   | 23.3 | 76.7 | 0.832  | 54.6 | 45.4 | 0.623 | 36.0 | 64.0 | 0.681   |
| Moderate                                  | 17.1 | 82.9 |       | 7.8  | 92.2  |           | 29.0 | 71.0 |        | 27.2 | 72.8 |         | 21.2 | 78.8 |        | 58.5 | 41.5 |       | 38.2 | 61.8 |         |
| High                                      | 25.0 | 75.0 |       | 12.5 | 87.5  |           | 37.5 | 62.5 |        | 25.0 | 75.0 |         | 25.0 | 75.0 |        | 62.5 | 37.5 |       | 25.0 | 75.0 |         |
| Quality of life                           |      |      |       |      |       |           |      |      |        |      |      |         |      |      |        |      |      |       |      |      |         |
| Poor                                      | 23.1 | 76.9 | 0.812 | 46.2 | 53.8  | <0.001*** | 46.2 | 53.8 | 0.402  | 61.5 | 38.5 | 0.013*  | 53.8 | 46.2 | 0.017* | 76.9 | 23.1 | 0.305 | 38.5 | 61.5 | 0.971   |
| Mild                                      | 18.2 | 81.8 |       | 7.4  | 92.6  |           | 29.0 | 71.0 |        | 26.4 | 73.6 |         | 20.8 | 79.2 |        | 55.4 | 44.6 |       | 36.9 | 63.1 |         |
| Good                                      | 16.7 | 83.3 |       | 10.0 | 90.0  |           | 28.7 | 71.3 |        | 24.0 | 76.0 |         | 24.0 | 76.0 |        | 56.7 | 43.3 |       | 36.0 | 64.0 |         |

All values are represented as percentages of undergraduate students, and *P*-values were determined using the chi-square test.

**Supplementary Table S6** Binary logistic regression of socio-demographic characteristics associated with each type of fruit intake among undergraduate students ( $n = 542$ ).

| Variables                                         | Citrus fruit           |                        | Pone fruit              |                         | Berries and other small fruits |                           | Assorted tropical and subtropical fruits (edible peel) |                           | Assorted tropical and subtropical fruits (inedible peel) |                          | Melon fruit            |                        |
|---------------------------------------------------|------------------------|------------------------|-------------------------|-------------------------|--------------------------------|---------------------------|--------------------------------------------------------|---------------------------|----------------------------------------------------------|--------------------------|------------------------|------------------------|
|                                                   | Adjusted OR (95% CI)   |                        | Adjusted OR (95% CI)    |                         | Adjusted OR (95% CI)           |                           | Adjusted OR (95% CI)                                   |                           | Adjusted OR (95% CI)                                     |                          | Adjusted OR (95% CI)   |                        |
|                                                   | Yes                    | No                     | Yes                     | No                      | Yes                            | No                        | Yes                                                    | No                        | Yes                                                      | No                       | Yes                    | No                     |
| <b>Sex (Reference = Male)</b>                     |                        |                        |                         |                         |                                |                           |                                                        |                           |                                                          |                          |                        |                        |
| <b>Female</b>                                     | 1.096<br>(0.664-1.810) | 0.912<br>(0.553-1.506) | 1.618<br>(1.086-2.410)* | 0.618<br>(0.415-0.921)* | 0.833<br>(0.544-1.276)         | 1.201<br>(0.784-1.839)    | 2.246<br>(1.499-3.363)***                              | 0.445<br>(0.297-0.667)*** | 1.765<br>(0.961-3.239)                                   | 0.567<br>(0.309-1.040)   | 0.956<br>(0.647-1.413) | 1.046<br>(0.708-1.546) |
| <b>Living (Reference = parents)</b>               |                        |                        |                         |                         |                                |                           |                                                        |                           |                                                          |                          |                        |                        |
| <b>Roommates</b>                                  | 0.690<br>(0.380-1.253) | 1.450<br>(0.798-2.635) | 0.592<br>(0.370-0.946)* | 1.689<br>(1.057-2.700)* | 0.469<br>(0.283-0.776)**       | 2.133<br>(1.288-3.532)**  | 0.759<br>(0.467-1.233)                                 | 1.318<br>(0.811-2.14)     | 0.627<br>(0.289-1.359)                                   | 1.596<br>(0.736-3.463)   | 1.278<br>(0.805-2.027) | 0.783<br>(0.493-1.242) |
| <b>Alone</b>                                      | 0.828<br>(0.430-1.597) | 1.208<br>(0.626-2.328) | 0.576<br>(0.342-0.969)* | 1.736<br>(1.032-2.920)* | 0.375<br>(0.210-0.670)***      | 2.666<br>(1.493-4.760)*** | 0.66<br>(0.387-1.126)                                  | 1.514<br>(0.888-2.581)    | 0.492<br>(0.218-1.114)                                   | 2.031<br>(0.898-4.594)   | 0.733<br>(0.439-1.223) | 1.365<br>(0.817-2.279) |
| <b>Cooking method (Reference = by themselves)</b> |                        |                        |                         |                         |                                |                           |                                                        |                           |                                                          |                          |                        |                        |
| <b>Buying from outside</b>                        | 1.075<br>(0.379-3.051) | 0.930<br>(0.328-2.641) | 1.210<br>(0.545-2.689)  | 0.826<br>(0.372-1.836)  | 1.791<br>(0.673-4.765)         | 0.558<br>(0.210-1.486)    | 1.401<br>(0.624-3.147)                                 | 0.714<br>(0.318-1.603)    | 3.297<br>(1.291-8.425)*                                  | 0.303<br>(0.119-0.775)*  | 1.351<br>(0.609-2.998) | 0.740<br>(0.334-1.643) |
| <b>By parents</b>                                 | 2.728<br>(0.902-8.249) | 0.367<br>(0.121-1.108) | 1.566<br>(0.647-3.790)  | 0.638<br>(0.264-1.545)  | 2.818<br>(0.996-7.970)*        | 0.355<br>(0.125-1.004)*   | 1.407<br>(0.573-3.452)                                 | 0.711<br>(0.290-1.745)    | 7.176<br>(1.957-26.307)**                                | 0.139<br>(0.038-0.511)** | 1.887<br>(0.784-4.543) | 0.53<br>(0.220-1.276)  |

\* Sig.  $\leq 0.05$ , \*\* Sig.  $\leq 0.01$ , \*\*\* Sig.  $\leq 0.001$

**Supplementary Table S7** Binary logistic regression of socio-demographic characteristics associated with each type of vegetable intake among undergraduate students ( $n = 542$ ).

| Variables                                 | Cucurbitaceae          |                        | Brassicaceae            |                          | Solanaceae              |                         | Lamiaceae                |                          | Physalacriaceae          |                          | Fabaceae                 |                          | Asteraceae               |                          |
|-------------------------------------------|------------------------|------------------------|-------------------------|--------------------------|-------------------------|-------------------------|--------------------------|--------------------------|--------------------------|--------------------------|--------------------------|--------------------------|--------------------------|--------------------------|
|                                           | Adjusted OR (95% CI)   |                        | Adjusted OR (95% CI)    |                          | Adjusted OR (95% CI)    |                         | Adjusted OR (95% CI)     |                          | Adjusted OR (95% CI)     |                          | Adjusted OR (95% CI)     |                          | Adjusted OR (95% CI)     |                          |
|                                           | Yes                    | No                     | Yes                     | No                       | Yes                     | No                      | Yes                      | No                       | Yes                      | No                       | Yes                      | No                       | Yes                      | No                       |
| Sex (Reference = Male)                    |                        |                        |                         |                          |                         |                         |                          |                          |                          |                          |                          |                          |                          |                          |
| Female                                    | 1.063<br>(0.636-1.775) | 0.981<br>(0.589-1.634) | 1.050<br>(0.511-2.157)  | 0.952<br>(0.464-1.956)   | 0.901<br>(0.579-1.401)  | 1.110<br>(0.714-1.727)  | 0.528<br>(0.326-0.858)** | 1.892<br>(1.166-3.071)** | 1.273<br>(0.789-2.055)   | 0.785<br>(0.487-1.267)   | 0.795<br>(0.535-1.183)   | 1.257<br>(0.845-1.87)    | 1.786<br>(1.184-2.693)** | 0.560<br>(0.371-0.844)** |
| BMI classification 2 (Reference = Obese)  |                        |                        |                         |                          |                         |                         |                          |                          |                          |                          |                          |                          |                          |                          |
| Underweight                               | 0.592<br>(0.258-1.362) | 1.690<br>(0.718-3.982) | 1.100<br>(0.397-3.044)  | 0.909<br>(0.329-2.516)   | 0.672<br>(0.328-1.374)  | 1.489<br>(0.728-3.045)  | 0.467<br>(0.197-1.107)   | 2.139<br>(0.903-5.067)   | 0.254<br>(0.100-0.642)** | 3.937<br>(1.557-9.953)** | 0.573<br>(0.299-1.098)   | 1.744<br>(0.911-3.339)   | 0.611<br>(0.313-1.191)   | 1.637<br>(0.840-3.193)   |
| Normal                                    | 0.788<br>(0.366-1.697) | 1.199<br>(0.546-2.632) | 1.785<br>(0.692-4.603)  | 0.560<br>(0.217-1.444)   | 0.677<br>(0.357-1.285)  | 1.477<br>(0.778-2.803)  | 0.333<br>(0.152-0.732)** | 3.001<br>(1.366-6.593)** | 0.352<br>(0.147-0.842)*  | 2.840<br>(1.188-6.79)*   | 0.734<br>(0.416-1.297)   | 1.362<br>(0.771-2.406)   | 0.83<br>(0.457-1.504)    | 1.205<br>(0.665-2.186)   |
| Overweight                                | 0.735<br>(0.286-1.886) | 1.259<br>(0.471-3.367) | 1.495<br>(0.384-5.827)  | 0.669<br>(0.172-2.606)   | 0.837<br>(0.358-1.960)  | 1.194<br>(0.51-2.796)   | 0.409<br>(0.155-1.075)   | 2.448<br>(0.930-6.441)   | 0.414<br>(0.142-1.203)   | 2.417<br>(0.831-7.027)   | 0.739<br>(0.354-1.542)   | 1.353<br>(0.649-2.821)   | 1.519<br>(0.670-3.444)   | 0.658<br>(0.290-1.493)   |
| Study Fields (Reference = Health Science) |                        |                        |                         |                          |                         |                         |                          |                          |                          |                          |                          |                          |                          |                          |
| Social and humunity                       | 0.772<br>(0.433-1.375) | 1.304<br>(0.737-2.307) | 0.926<br>(0.412-2.081)  | 1.080<br>(0.480-2.428)   | 1.079<br>(0.663-1.754)  | 0.927<br>(0.57-1.508)   | 0.767<br>(0.461-1.275)   | 1.304<br>(0.784-2.169)   | 0.530<br>(0.308-0.911)*  | 1.887<br>(1.097-3.244)*  | 0.973<br>(0.617-1.535)   | 1.028<br>(0.651-1.622)   | 0.811<br>(0.509-1.291)   | 1.233<br>(0.775-1.964)   |
| Sciences and Technology                   | 1.030<br>(0.558-1.901) | 0.968<br>(0.527-1.780) | 1.097<br>(0.471-2.556)  | 0.912<br>(0.391-2.124)   | 1.661<br>(0.984-2.803)* | 0.602<br>(0.357-1.016)* | 0.963<br>(0.558-1.661)   | 1.038<br>(0.602-1.791)   | 0.825<br>(0.460-1.482)   | 1.212<br>(0.675-2.176)   | 1.127<br>(0.707-1.796)   | 0.887<br>(0.557-1.414)   | 1.258<br>(0.77-2.057)    | 0.795<br>(0.486-1.299)   |
| Academic year (Reference = Senior)        |                        |                        |                         |                          |                         |                         |                          |                          |                          |                          |                          |                          |                          |                          |
| Freshman                                  | 1.334<br>(0.674-2.639) | 0.808<br>(0.412-1.582) | 2.408<br>(0.986-5.882)  | 0.415<br>(0.170-1.014)   | 1.053<br>(0.589-1.884)  | 0.950<br>(0.531-1.698)  | 0.750<br>(0.413-1.361)   | 1.334<br>(0.735-2.422)   | 1.088<br>(0.59-2.009)    | 0.919<br>(0.498-1.696)   | 1.216<br>(0.714-2.069)   | 0.822<br>(0.483-1.400)   | 0.780<br>(0.455-1.337)   | 1.282<br>(0.748-2.197)   |
| Sophomore                                 | 1.425<br>(0.706-2.878) | 0.756<br>(0.379-1.508) | 2.334<br>(0.950-5.736)  | 0.428<br>(0.174-1.053)   | 0.85<br>(0.473-1.525)   | 1.177<br>(0.656-2.113)  | 0.904<br>(0.490-1.667)   | 1.106<br>(0.600-2.041)   | 1.327<br>(0.692-2.541)   | 0.754<br>(0.393-1.444)   | 1.344<br>(0.782-2.312)   | 0.744<br>(0.433-1.279)   | 1.058<br>(0.609-1.838)   | 0.945<br>(0.544-1.643)   |
| Junior                                    | 0.945<br>(0.496-1.803) | 1.074<br>(0.564-2.044) | 3.66<br>(1.423-9.414)** | 0.273<br>(0.106-0.703)** | 0.869<br>(0.489-1.544)  | 1.151<br>(0.648-2.045)  | 0.924<br>(0.504-1.694)   | 1.082<br>(0.590-1.982)   | 1.119<br>(0.607-2.060)   | 0.894<br>(0.485-1.646)   | 1.585<br>(0.933-2.693)   | 0.631<br>(0.371-1.071)   | 0.953<br>(0.556-1.635)   | 1.049<br>(0.612-1.798)   |
| Income (Reference = > 10,000 baht/month)  |                        |                        |                         |                          |                         |                         |                          |                          |                          |                          |                          |                          |                          |                          |
| ≤5,000 baht/month                         | 1.645<br>(0.81-3.340)  | 0.641<br>(0.318-1.294) | 0.874<br>(0.372-2.054)  | 0.547<br>(0.219-1.370)   | 0.739<br>(0.409-1.337)  | 1.352<br>(0.748-2.445)  | 1.048<br>(0.559-1.965)   | 0.954<br>(0.509-1.788)   | 0.701<br>(0.357-1.379)   | 1.426<br>(0.725-2.805)   | 1.824<br>(1.056-3.151)*  | 0.548<br>(0.317-0.947)*  | 0.626<br>(0.349-1.124)   | 1.598<br>(0.890-2.869)   |
| 5,001-10,000 baht/month                   | 1.092<br>(0.588-2.028) | 0.936<br>(0.506-1.732) | 0.987<br>(0.384-2.535)  | 0.499<br>(0.213-1.166)   | 1.094<br>(0.624-1.915)  | 0.914<br>(0.522-1.602)  | 0.934<br>(0.521-1.672)   | 1.071<br>(0.598-1.919)   | 0.737<br>(0.394-1.376)   | 1.358<br>(0.727-2.537)   | 1.038<br>(0.628-1.716)   | 0.964<br>(0.583-1.594)   | 0.605<br>(0.352-1.042)   | 1.652<br>(0.960-2.844)   |
| Online class (Reference = > 3 days/week)  |                        |                        |                         |                          |                         |                         |                          |                          |                          |                          |                          |                          |                          |                          |
| ≤3 days/week                              | 0.875<br>(0.536-1.430) | 1.154<br>(0.711-1.875) | 0.731<br>(0.371-1.441)  | 1.367<br>(0.694-2.694)   | 0.738<br>(0.488-1.116)  | 1.355<br>(0.896-2.049)  | 0.782<br>(0.507-1.208)   | 1.278<br>(0.828-1.974)   | 0.573<br>(0.362-0.907)*  | 1.745<br>(1.103-2.761)*  | 0.600<br>(0.408-0.884)** | 1.666<br>(1.132-2.453)** | 0.670<br>(0.451-0.996)*  | 1.493<br>(1.004-2.219)*  |

| Cooking method (Reference = by themself) |               |               |                   |                  |               |               |                  |                 |                 |                |                |               |               |               |
|------------------------------------------|---------------|---------------|-------------------|------------------|---------------|---------------|------------------|-----------------|-----------------|----------------|----------------|---------------|---------------|---------------|
| Buying from outside                      | 1.868         | 0.540         | 3.544             | 0.282            | 0.644         | 1.552         | 3.609            | 0.277           | 1.680           | 0.595          | 1.527          | 0.655         | 0.753         | 1.327         |
|                                          | (0.758-4.606) | (0.220-1.324) | (1.242-10.113)*   | (0.099-0.805)*   | (0.255-1.632) | (0.613-3.929) | (1.578-8.253)**  | (0.121-0.634)** | (0.696-4.060)   | (0.246-1.438)  | (0.667-3.497)  | (0.286-1.499) | (0.319-1.778) | (0.562-3.134) |
| by parents                               | 2.571         | 0.402         | 3.675             | 0.272            | 0.824         | 1.213         | 3.195            | 0.313           | 2.261           | 0.442          | 2.12           | 0.472         | 0.913         | 1.095         |
|                                          | (0.909-7.271) | (0.144-1.126) | (1.034-13.064)*   | (0.077-0.967)*   | (0.297-2.287) | (0.437-3.366) | (1.268-8.053)**  | (0.124-0.789)** | (0.812-6.296)   | (0.159-1.232)  | (0.855-5.261)  | (0.190-1.170) | (0.355-2.351) | (0.425-2.821) |
| Quality of life (Reference = Poor)       |               |               |                   |                  |               |               |                  |                 |                 |                |                |               |               |               |
| Mild                                     | 1.075         | 0.938         | 12.748            | 0.078            | 2.871         | 0.348         | 5.914            | 0.169           | 5.41            | 0.185          | 3.440          | 0.291         | 1.462         | 0.684         |
|                                          | (0.268-4.312) | (0.235-3.752) | (3.201-50.779)*** | (0.020-0.312)*** | (0.878-9.389) | (0.107-1.139) | (1.645-21.266)** | (0.047-0.608)** | (1.548-18.905)* | (0.053-0.646)* | (0.857-13.812) | (0.072-1.168) | (0.435-4.914) | (0.203-2.299) |
| Good                                     | 1.303         | 0.774         | 9.783             | 0.102            | 2.76          | 0.362         | 7.068            | 0.141           | 4.372           | 0.229          | 3.462          | 0.289         | 1.421         | 0.704         |
|                                          | (0.309-5.486) | (0.185-3.235) | (2.330-41.079)**  | (0.024-0.429)**  | (0.817-9.32)  | (0.107-1.223) | (1.900-26.298)** | (0.038-0.526)** | (1.215-15.733)* | (0.064-0.823)* | (0.843-14.225) | (0.070-1.187) | (0.411-4.909) | (0.204-2.432) |
